# Supplementary material for: PD-1 IC Inhibition Synergistically Improves Influenza A Virus-Mediated Oncolysis of Metastatic Pulmonary Melanoma
Source: PubMed Central journal article supplement — Mol Ther Oncolytics. 2020 Apr 8;17:190–204. doi: 10.1016/j.omto.2020.03.023 (PMC7178321; doi:10.1016/j.omto.2020.03.023), 2020-04-08
Supplement: mmc1.pdf [file mmc1.pdf]

**OMTO, Volume 17**

**Supplemental Information**

**PD-1 IC Inhibition Synergistically  
Improves Influenza A Virus-Mediated Oncolysis  
of Metastatic Pulmonary Melanoma**

**Siarhei Sitnik, Dörthe Masemann, Rafael Leite Dantas, Viktor Wixler, and Stephan Ludwig**

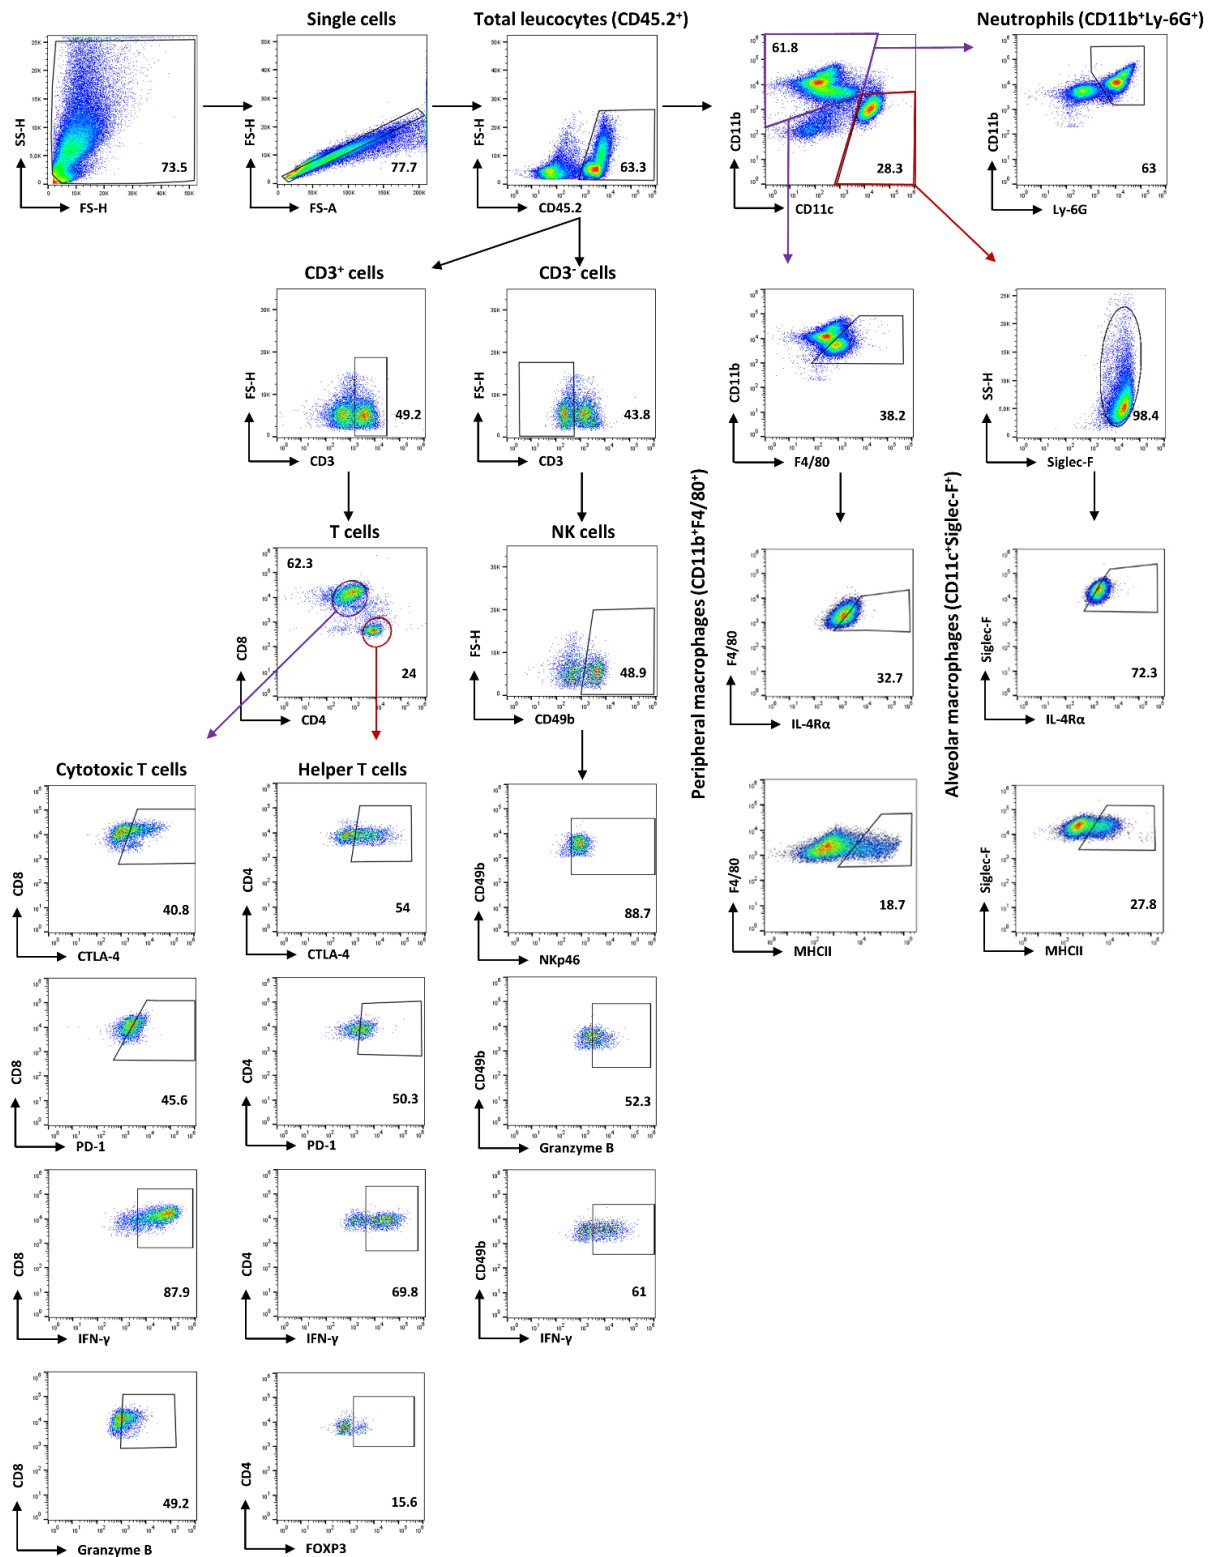

**Supplementary Figure 1.**

Representative dot-plot images of BALF immune cells, emphasizing the gating strategy for quantification of different immune cell population sets as well as activation markers. Representative images of BALF cells from a control mouse infected for three days with IAV are presented.

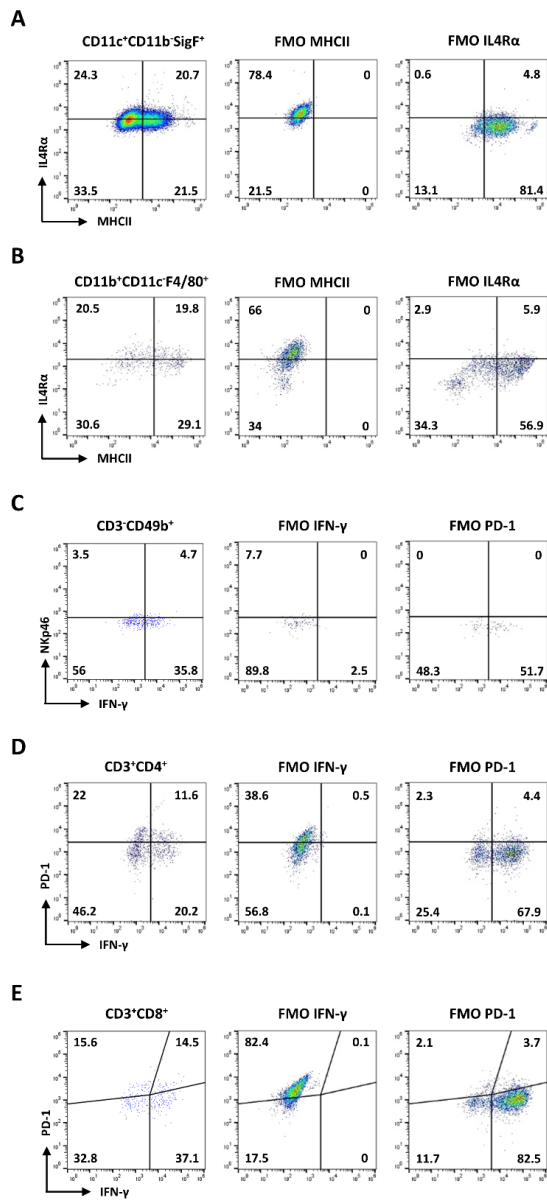

### Supplementary Figure 2.

Dot-plot images of BALF immune cells shown in Figure 2 (left images) and their corresponding FMO (fluorescence minus one) controls (middle and right images), emphasizing the gating strategy used for quantification of different immune cell population sets on day 19 post tumor implantation.
